# Supplementary material for: Are micronutrient levels and supplements causally associated with the risk of Alzheimer's disease? A two-sample Mendelian randomization analysis
Source: Royal Society of Chemistry journal article supplement (doi:10.1039/d1fo03574f), 2022-01-01
Supplement: d1fo03574f1.pdf [file d1fo03574f1.pdf]

**Table S1:** Eligible studies examining the casual association between micronutrients and AD.

| <b>classification of micronutrient</b> | <b>exposure</b> | <b>id</b>                                                     | <b>trait</b>                                     | <b>Reference (PMID)</b> |
|----------------------------------------|-----------------|---------------------------------------------------------------|--------------------------------------------------|-------------------------|
| Mineral                                | Magnesium       | ukb-b-5536                                                    | Vitamin and/or mineral supplement use: Magnesium | NA                      |
|                                        |                 | ukb-b-6539                                                    | Treatment/medication code: minerals - magnesium  | NA                      |
|                                        | Calcium         | ukb-d-30680_raw                                               | Calcium                                          | NA                      |
|                                        |                 | bbj-a-15                                                      | Calcium                                          | 29403010                |
|                                        |                 | ukb-d-30680_irnt                                              | Calcium                                          | NA                      |
|                                        |                 | ukb-a-495                                                     | Mineral and other dietary supplements: Calcium   | NA                      |
|                                        |                 | ukb-b-19550                                                   | Vitamin and/or mineral supplement use: Calcium   | NA                      |
|                                        |                 | ukb-b-7043                                                    | Mineral and other dietary supplements: Calcium   | NA                      |
|                                        | Iron            | ieu-a-1049                                                    | Iron                                             | 25352340                |
|                                        |                 | ukb-b-18395                                                   | Treatment/medication code: iron product          | NA                      |
| ukb-b-14863                            |                 | Mineral and other dietary supplements: Iron                   | NA                                               |                         |
| ukb-b-15326                            |                 | Vitamin and/or mineral supplement use: Multivitamin with iron | NA                                               |                         |
| Copper                                 | ieu-a-1073      | Copper                                                        | 23720494                                         |                         |
|                                        | ieu-a-1074      | Copper                                                        | 23720494                                         |                         |
| Zinc                                   | ieu-a-1080      | Zinc                                                          | 23720494                                         |                         |
|                                        | ieu-a-1079      | Zinc                                                          | 23720494                                         |                         |
|                                        | ukb-a-496       | Mineral and other dietary supplements: Zinc                   | NA                                               |                         |
|                                        | ukb-b-19262     | Treatment/medication code: zinc product                       | NA                                               |                         |
|                                        | ukb-b-10567     | Vitamin and/or mineral supplement use: Zinc                   | NA                                               |                         |
|                                        | ukb-b-13891     | Mineral and other dietary supplements: Zinc                   | NA                                               |                         |
|                                        | Selenium        | ieu-a-1075                                                    | Selenium                                         | 23720494                |

|         |            |             |                                                                |          |
|---------|------------|-------------|----------------------------------------------------------------|----------|
|         |            | ieu-a-1076  | Selenium                                                       | 23720494 |
|         |            | ieu-a-1077  | Selenium                                                       | 23720494 |
|         |            | ieu-a-1078  | Selenium                                                       | 23720494 |
|         |            | ukb-a-497   | Mineral and other dietary supplements: Selenium                | NA       |
|         |            | ukb-b-19158 | Mineral and other dietary supplements: Selenium                | NA       |
|         |            | ukb-b-16639 | Vitamin and/or mineral supplement use: Selenium                | NA       |
|         |            | ukb-b-20415 | Treatment/medication code: selenium product                    | NA       |
|         | Phosphorus | bbj-a-45    | Phosphorus                                                     | 29403010 |
| Vitamin | Vitamin A  | ukb-a-458   | Vitamin and mineral supplements: Vitamin A                     | NA       |
|         |            | ukb-b-9596  | Vitamin and mineral supplements: Vitamin A                     | NA       |
|         | Vitamin B  | ukb-b-129   | Vitamin and/or mineral supplement use: Vitamin B6              | NA       |
|         |            | ukb-b-18819 | Treatment/medication code: vitamin b12 preparation             | NA       |
|         |            | ukb-a-460   | Vitamin and mineral supplements: Vitamin B                     | NA       |
|         |            | ukb-b-10188 | Vitamin and mineral supplements: Vitamin B                     | NA       |
|         |            | ukb-b-5474  | Vitamin and/or mineral supplement use: Vitamin B12             | NA       |
|         |            | ukb-a-135   | Treatment/medication code: vitamin b12 preparation             | NA       |
|         |            | ukb-b-288   | Treatment/medication code: folic acid product                  | NA       |
|         |            | ukb-b-3563  | Vitamin and mineral supplements: Folic acid or Folate (Vit B9) | NA       |
|         |            | ukb-a-134   | Treatment/medication code: hydroxocobalamin product            | NA       |
|         | Vitamin C  | met-a-348   | Ascorbate (Vitamin C)                                          | 24816252 |
|         |            | ukb-b-12466 | Treatment/medication code: vitamin c product                   | NA       |
|         |            | ukb-b-15175 | Vitamin and mineral supplements: Vitamin C                     | NA       |
|         |            | ukb-b-488   | Treatment/medication code: vitamin c product                   | NA       |
|         |            | ukb-b-4690  | Vitamin and/or mineral supplement use: Vitamin C               | NA       |
|         |            | ukb-a-461   | Vitamin and mineral supplements: Vitamin C                     | NA       |

|           |                  |                                                              |          |
|-----------|------------------|--------------------------------------------------------------|----------|
| Vitamin D | ebi-a-GCST005367 | Vitamin D levels                                             | 29343764 |
|           | ukb-d-30890_irnt | Vitamin D                                                    | NA       |
|           | ukb-d-30890_raw  | Vitamin D                                                    | NA       |
|           | ukb-b-6549       | Treatment/medication code: calcium+vitamin d 500units tablet | NA       |
|           | ukb-a-462        | Vitamin and mineral supplements: Vitamin D                   | NA       |
|           | ukb-b-5079       | Vitamin and/or mineral supplement use: Vitamin D             | NA       |
|           | ukb-b-4991       | Treatment/medication code: vitamin d product                 | NA       |
|           | ukb-b-12648      | Vitamin and mineral supplements: Vitamin D                   | NA       |
| Vitamin E | met-a-340        | Alpha-tocopherol                                             | 24816252 |
|           | met-a-571        | Gamma-tocopherol                                             | 24816252 |
|           | ukb-b-16288      | Treatment/medication code: vitamin e product                 | NA       |
|           | ukb-a-463        | Vitamin and mineral supplements: Vitamin E                   | NA       |
|           | ukb-b-12506      | Vitamin and mineral supplements: Vitamin E                   | NA       |
|           | ukb-b-14518      | Vitamin and/or mineral supplement use: Vitamin E             | NA       |

---

**Table S2.** 2SMR estimations of the causality between vitamin levels and AD risk.

| Vitamins  | Exposure                                | Method                    | Numbers of SNPs | b            | se          | P-value     |
|-----------|-----------------------------------------|---------------------------|-----------------|--------------|-------------|-------------|
| Vitamin D | Vitamin D levels    id:ebi-a-GCST005367 | MR Egger                  | 6               | -0.63810815  | 0.954830196 | 0.540531921 |
|           |                                         | Inverse variance weighted | 6               | -0.747156172 | 0.28860411  | 0.009629372 |
|           |                                         | Weighted median           | 6               | -0.563408401 | 0.355727854 | 0.113234999 |
|           |                                         | Weighted mode             | 6               | -0.531110588 | 0.382149773 | 0.223293562 |
|           | Vitamin D    id:ukb-d-30890_irnt        | MR Egger                  | 44              | -0.192041644 | 0.092921335 | 0.044962359 |
|           |                                         | Inverse variance weighted | 44              | -0.154339158 | 0.069573184 | 0.026529523 |
|           |                                         | Weighted median           | 44              | -0.19318717  | 0.079268594 | 0.014804716 |
|           |                                         | Weighted mode             | 44              | -0.193702196 | 0.067368648 | 0.006254783 |
|           | Vitamin D    id:ukb-d-30890_raw         | MR Egger                  | 42              | -0.002923992 | 0.012859734 | 0.82128975  |
|           |                                         | Inverse variance weighted | 42              | -0.00972508  | 0.009869781 | 0.324457589 |
|           |                                         | Weighted median           | 42              | -0.009052643 | 0.003686014 | 0.014051521 |
|           |                                         | Weighted mode             | 42              | -0.008255205 | 0.003281785 | 0.015900168 |

**Table S3.** 2SMR estimations of the causality between vitamin supplements and AD risk.

| <b>Vitamin Supplements</b> | <b>Exposure</b>                                                           | <b>Method</b>                | <b>Numbers of SNPs</b> | <b>b</b>     | <b>se</b>   | <b>P-value</b> |
|----------------------------|---------------------------------------------------------------------------|------------------------------|------------------------|--------------|-------------|----------------|
| folic acid<br>(vitamin B9) | Treatment/medication<br>code: folic acid product<br>   id:ukb-b-288       | Inverse variance<br>weighted | 2                      | -15.16307096 | 17.54776697 | 0.387531534    |
|                            |                                                                           | MR Egger                     | 3                      | -126.7589927 | 396.6162332 | 0.803067355    |
| Cobalamin<br>(vitamin B12) | Treatment/medication<br>code: hydroxocobalamin<br>product    id:ukb-a-134 | Inverse variance<br>weighted | 3                      | -2.004701679 | 51.44816342 | 0.968917922    |
|                            |                                                                           | Weighted median              | 3                      | 10.41565106  | 60.01228502 | 0.862212333    |
|                            |                                                                           | Weighted mode                | 3                      | 15.75051463  | 73.08066139 | 0.849342165    |

**Table S4.** 2SMR estimations of the causality between mineral levels and AD risk.

| Minerals | Exposure                      | Method                    | Numbers of SNPs | b            | se          | P-value     |
|----------|-------------------------------|---------------------------|-----------------|--------------|-------------|-------------|
| Calcium  | Calcium    id:bbj-a-15        | MR Egger                  | 11              | -1.168569755 | 0.994028955 | 0.269919988 |
|          |                               | Inverse variance weighted | 11              | -0.020657052 | 0.220731999 | 0.925439374 |
|          |                               | Weighted median           | 11              | 0.00923976   | 0.221459891 | 0.96672028  |
|          |                               | Weighted mode             | 11              | 0.031522561  | 0.300069405 | 0.918412676 |
|          | Calcium    id:ukb-d-30680_irt | MR Egger                  | 159             | -0.205664363 | 0.098924066 | 0.039242512 |
|          |                               | Inverse variance weighted | 159             | 0.005876516  | 0.055790889 | 0.916113085 |
|          |                               | Weighted median           | 159             | -0.156079035 | 0.099990353 | 0.118537688 |
|          |                               | Weighted mode             | 159             | -0.150615598 | 0.093407305 | 0.108857409 |
|          | Calcium    id:ukb-d-30680_raw | MR Egger                  | 153             | -2.648939899 | 1.102806015 | 0.017520719 |
|          |                               | Inverse variance weighted | 153             | 0.333864268  | 0.621185044 | 0.590947513 |
|          |                               | Weighted median           | 153             | -1.661373081 | 1.062368938 | 0.117855581 |
|          |                               | Weighted mode             | 153             | -1.902975481 | 1.122387243 | 0.092033457 |
| Iron     | Iron    id:ieu-a-1049         | MR Egger                  | 3               | -0.078580602 | 0.117416321 | 0.624529719 |
|          |                               | Inverse variance weighted | 3               | -0.025620846 | 0.058841429 | 0.663256227 |
|          |                               | Weighted median           | 3               | -0.03165185  | 0.064509088 | 0.623668909 |

|            |                           |                           |   |              |             |             |
|------------|---------------------------|---------------------------|---|--------------|-------------|-------------|
| Copper     | Copper    id:ieu-a-1073   | Weighted mode             | 3 | -0.03347395  | 0.070244165 | 0.680678574 |
|            |                           | Inverse variance weighted | 2 | -0.144584218 | 0.072598111 | 0.04641826  |
| Zinc       | Zinc    id:ieu-a-1079     | Inverse variance weighted | 2 | -0.014035699 | 0.075691812 | 0.85289006  |
| Phosphorus | Phosphorus    id:bbj-a-45 | MR Egger                  | 7 | -0.165393414 | 0.472403763 | 0.740521736 |
|            |                           | Inverse variance weighted | 7 | 0.057060034  | 0.134837365 | 0.672166333 |
|            |                           | Weighted median           | 7 | 0.020854088  | 0.136925921 | 0.87894877  |
|            |                           | Weighted mode             | 7 | -0.050007121 | 0.173442392 | 0.782801902 |

---

**Table S5.** 2SMR estimations of the causality between mineral supplements and AD risk.

| <b>Mineral Supplements</b> | <b>Exposure</b>                                                | <b>Method</b>             | <b>Numbers of SNPs</b> | <b>b</b>     | <b>se</b>   | <b>P-value</b> |
|----------------------------|----------------------------------------------------------------|---------------------------|------------------------|--------------|-------------|----------------|
| Calcium                    | Mineral and other dietary supplements: Calcium    id:ukb-a-495 | Inverse variance weighted | 2                      | -0.575650421 | 3.373836605 | 0.864521075    |
|                            |                                                                | MR Egger                  | 4                      | -3.282264455 | 12.20764426 | 0.813226031    |
|                            |                                                                | Inverse variance weighted | 4                      | -1.037451624 | 2.660370704 | 0.696562383    |
|                            |                                                                | Weighted median           | 4                      | -1.449278878 | 3.190808876 | 0.649681841    |
| Zinc                       | Mineral and other dietary supplements: Zinc    id:ukb-b-13891  | Weighted mode             | 4                      | -1.49765712  | 3.68180572  | 0.711455801    |
|                            |                                                                | MR Egger                  | 3                      | -5.382937355 | 17.31287291 | 0.808093652    |
|                            |                                                                | Inverse variance weighted | 3                      | -1.9467875   | 4.379315265 | 0.656651111    |
|                            |                                                                | Weighted median           | 3                      | -5.33414394  | 5.023504184 | 0.288309569    |
|                            |                                                                | Weighted mode             | 3                      | -6.046820818 | 6.229867988 | 0.434126157    |
